# Supplementary material for: Echinochrome Prevents Sulfide Catabolism-Associated Chronic Heart Failure after Myocardial Infarction in Mice
Source: MDPI journal article supplement (doi:10.3390/md21010052), 2023-01-12
Supplement: s1 [file s1]

## **Supplementary Materials**

### **Echinochrome prevents sulfide catabolism-associated chronic heart failure after myocardial infarction in mice**

Xiaokang Tang, Akiyuki Nishimura, Kohei Ariyoshi, Kazuhiro Nishiyama, Yuri Kato, Elena A Vasileva, Natalia P. Mishchenko, Sergey A. Fedoreyev, Valentin A. Stonik, Hyoungh-Kyu Kim, Jin Han, Yasunari Kanda, Keitaro Umezawa, Yasuteru Urano, Takaaki Akaike and Motohiro Nishida

(A)

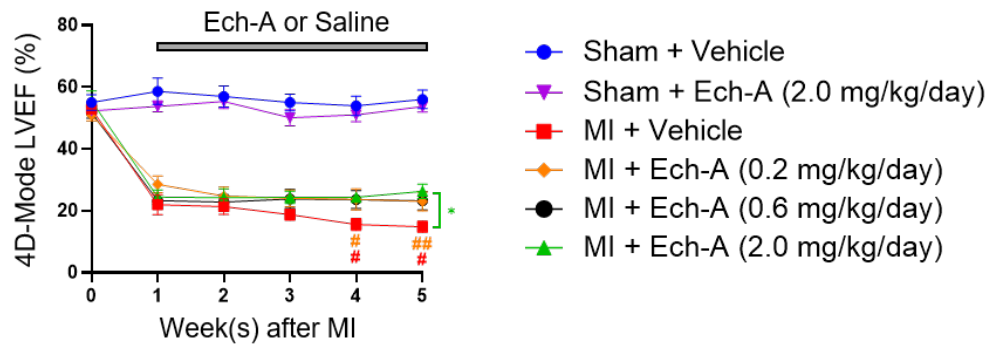

(B)

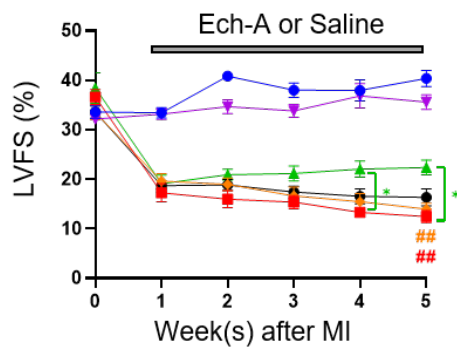

(C)

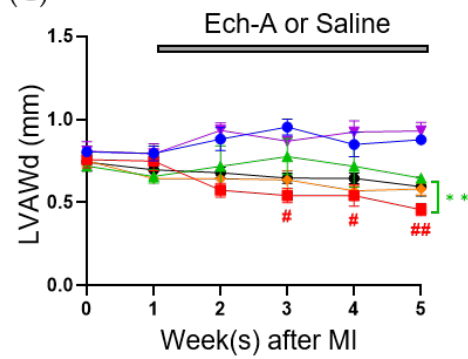

(D)

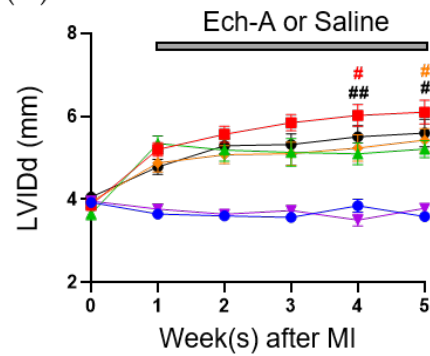

(E)

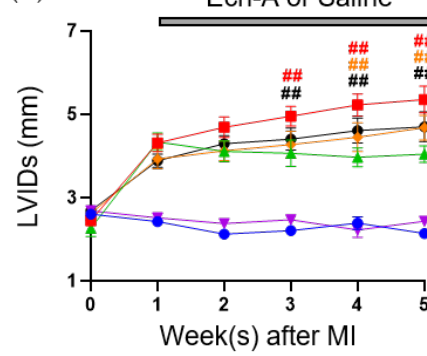

(F)

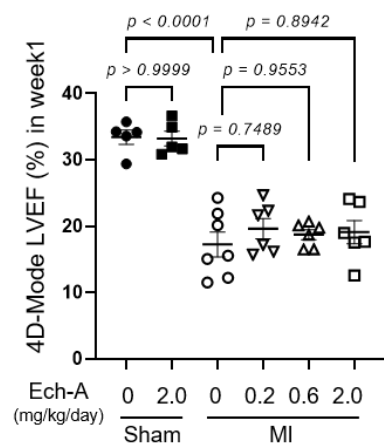

(G)

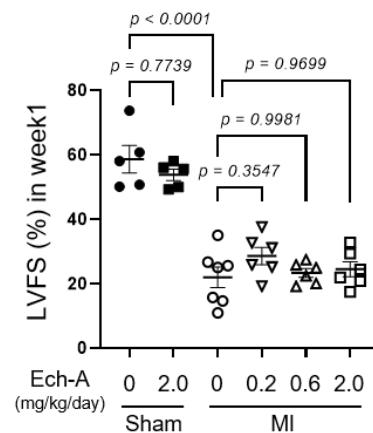

**Figure S1.** Temporal changes in echocardiographic parameters. (A–E) Changes in 4D-mode LV ejection fraction (LVEF) (A), LV fractional shortening (LVFS) (B), LV anterior wall thickness at end diastole (LVAWd) (C), LV internal diameter at end diastole (LVIDd) (D) and end systole (LVIDs) (E) in mice after MI. Osmotic pump filled with Ech-A or vehicle was implanted intraperitoneally 7 days after MI. (F,G) Quantification of LVEF (F) and LVFS (G) at 1 week after MI (before Ech-A administration). (Sham + vehicle (●): n=5, Sham + Ech-A 2.0 mg/kg/day (■): n=5, MI + vehicle (○): n=7, MI + Ech-A 0.2 mg/kg/day (▽): n=6, MI + Ech-A 0.6 mg/kg/day (△): n=6, MI + Ech-A 2.0 mg/kg/day (□): n=6). Data were presented as mean ± s.e.m. \*P<0.05, \*\*P<0.01 using two-way ANOVA followed by Šídák's multiple comparison test, compared to the value in the MI-Vehicle group (A–E). #P<0.05, ##P<0.01 using two-way ANOVA followed by Dunnett's multiple comparison test, compared to the respective value at 1 week (A–E). P-values were calculated using one-way ANOVA followed by Šídák's multiple comparisons test (F,G).

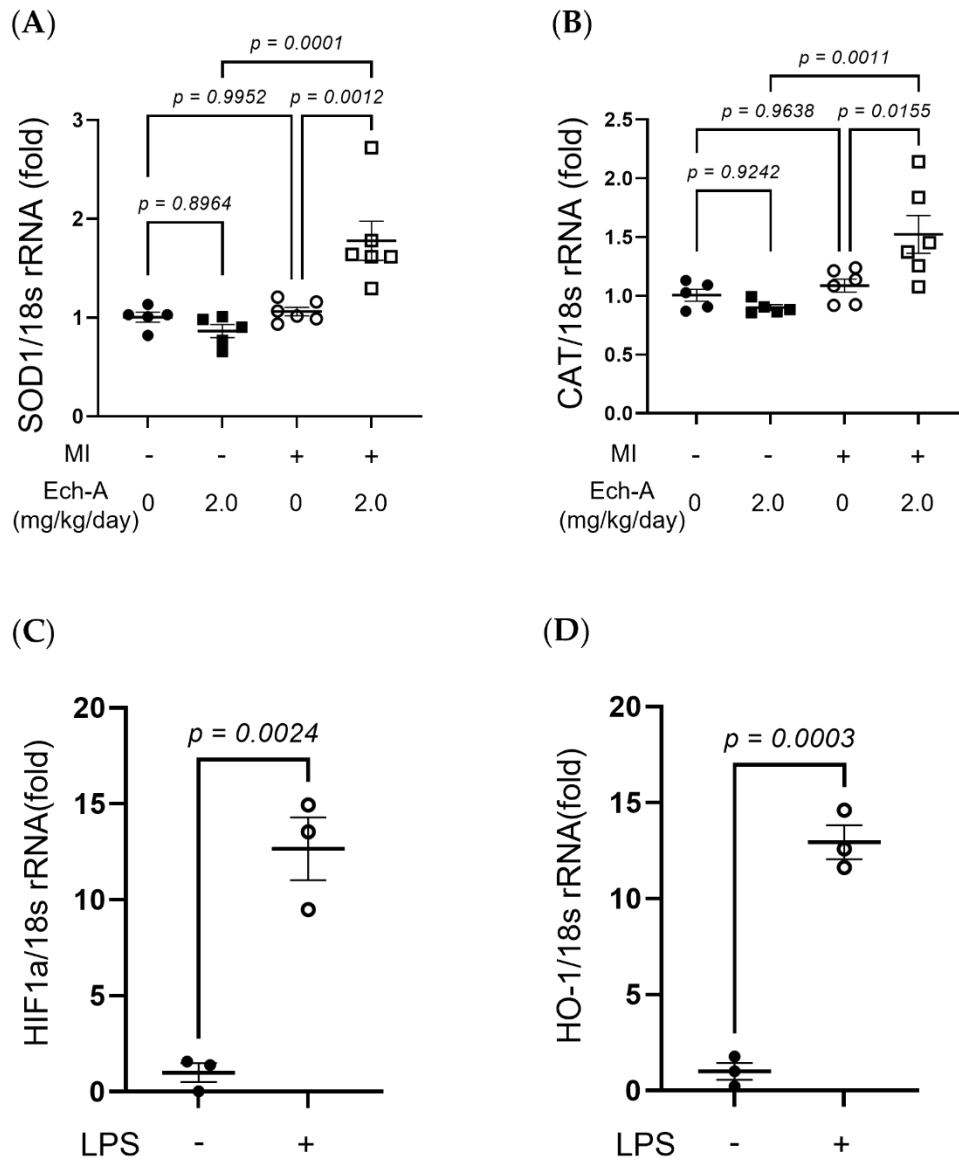

**Figure S2.** Gene expression levels of antioxidant enzymes in mouse heart and hypoxic markers in BMDM. **(A,B)** Expression levels of *superoxide dismutase 1* (SOD1) and *catalase* (CAT) mRNAs in sham and MI mouse hearts 5 weeks after operation. (Sham + vehicle (●): n=5, Sham + Ech-A 2.0 mg/kg/day (■): n=5, MI + vehicle (○): n=6, MI + Ech-A 2.0 mg/kg/day (□): n=6) **(C,D)** Expression levels of *hypoxia inducible factor 1 subunit alpha* (HIF1a) and *heme oxygenase-1* (HO-1) mRNAs in BMDM treat with or without LPS (5 ng/ml) and IFN $\gamma$  (10 ng/ml) for 24 h. (Control + vehicle (●), LPS + vehicle (○): n=3) Data were presented as mean  $\pm$  s.e.m. P-values were calculated using one-way ANOVA followed by Šídák's multiple comparisons test **(A,B)** or unpaired t test **(C,D)**.

Table S1. Primer sequences for qPCR

| Gene              | Primer sequence |                             |
|-------------------|-----------------|-----------------------------|
| 18s rRNA (rodent) | Forward         | ATTAATCAAGAACGAAAGTCGCAGGT  |
|                   | Reverse         | TTTAAGTTTCAGCTTTGCAACCATACT |
| SOD1 (mouse)      | Forward         | GGAAGCATGGCGATGAAA          |
|                   | Reverse         | AAATGAGGTCCTGCACTGGTA       |
| CAT (mouse)       | Forward         | AAGGTTTGGCCTCACAAGGA        |
|                   | Reverse         | GCGGTAGGGACAGTTCACAG        |
| HIF1a (mouse)     | Forward         | ACCTTCATCGGAAACTCCAAAG      |
|                   | Reverse         | CTGTTAGGCTGGGAAAAGTTAGG     |
| HO-1 (mouse)      | Forward         | AAGCCGAGAATGCTGAGTTCA       |
|                   | Reverse         | GCCGTGTAGATATGGTACAAGGA     |
